# Supplementary material for: Temperature compensation in a small rhythmic circuit
Source: eLife journal article supplement (doi:10.7554/elife.55470), 2020-06-02

**A**

burst freq. [Hz]

duty cycle

mean phase

10 Temp.[°C] 25

PD off LP on LP off PY on PY off

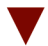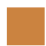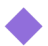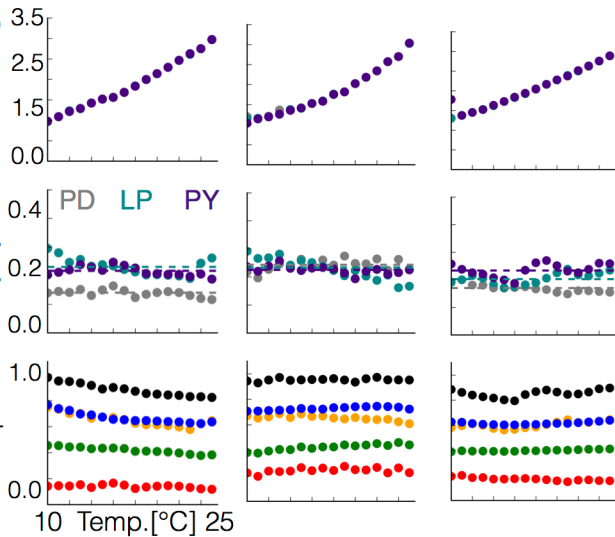**B**Maximal conductances  $G$ 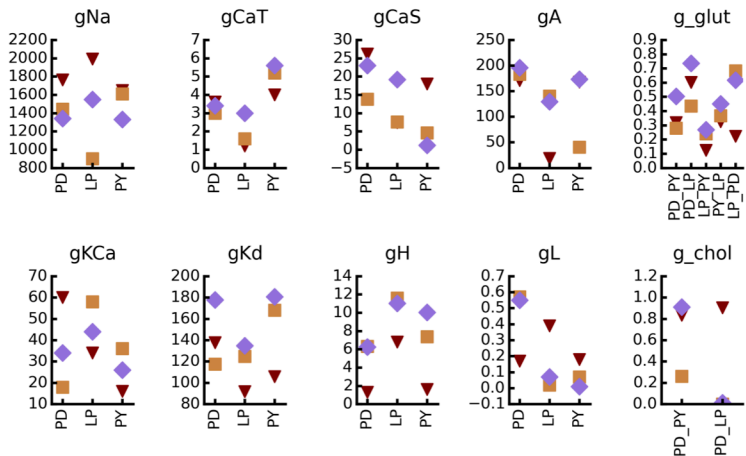Temperature sensitivities  $Q_{10}$ 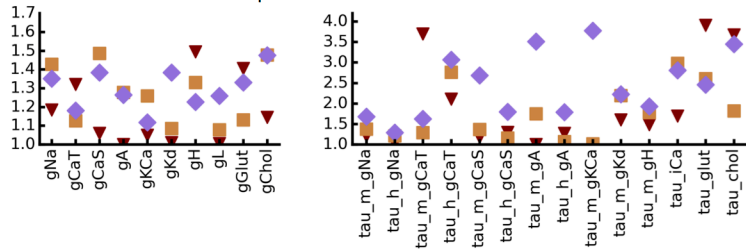

Supplement: supp [file elife-55470-supp-v1.zip]
