# Supplementary material for: Temperature compensation in a small rhythmic circuit
Source: eLife journal article supplement (doi:10.7554/elife.55470), 2020-06-02
Supplement: supp [file elife-55470-supp-v1.zip]

Archive with 6 entries (6 files):
- elife_poa_e55470_Transparent_Reporting_File.pdf
- elife_poa_e55470_Figure_1_figure_supplement_1.pdf
- elife_poa_e55470_Figure_1_figure_supplement_2.pdf
- elife_poa_e55470_Figure_1_figure_supplement_3.pdf
- elife_poa_e55470_Figure_2_figure_supplement_1.pdf
- elife_poa_e55470_Figure_6_figure_supplement_1.pdf
