# Supplementary figures and images for: Temperature compensation in a small rhythmic circuit
Source: eLife journal article supplement (doi:10.7554/elife.55470), 2020-06-02

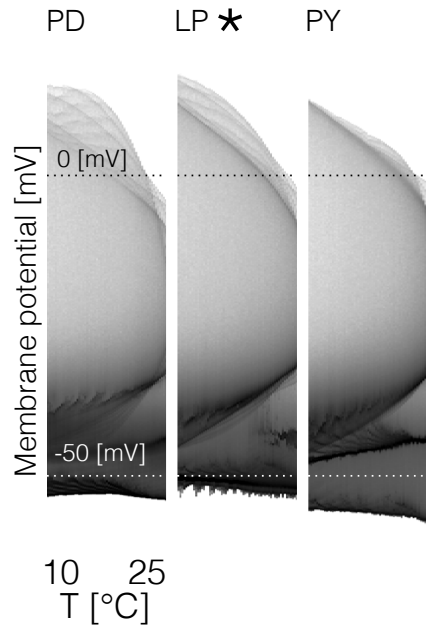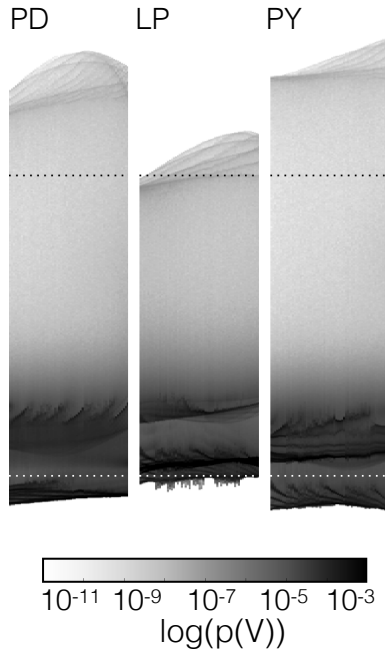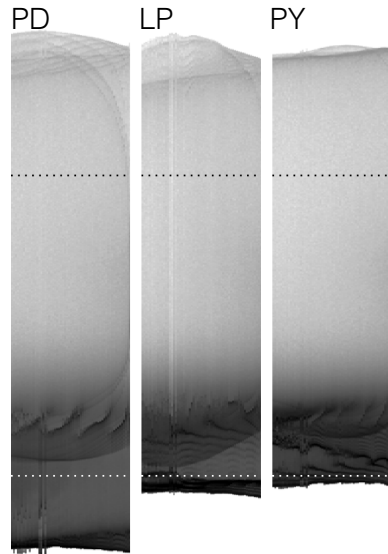

Supplement: supp [file elife-55470-supp-v1.zip]

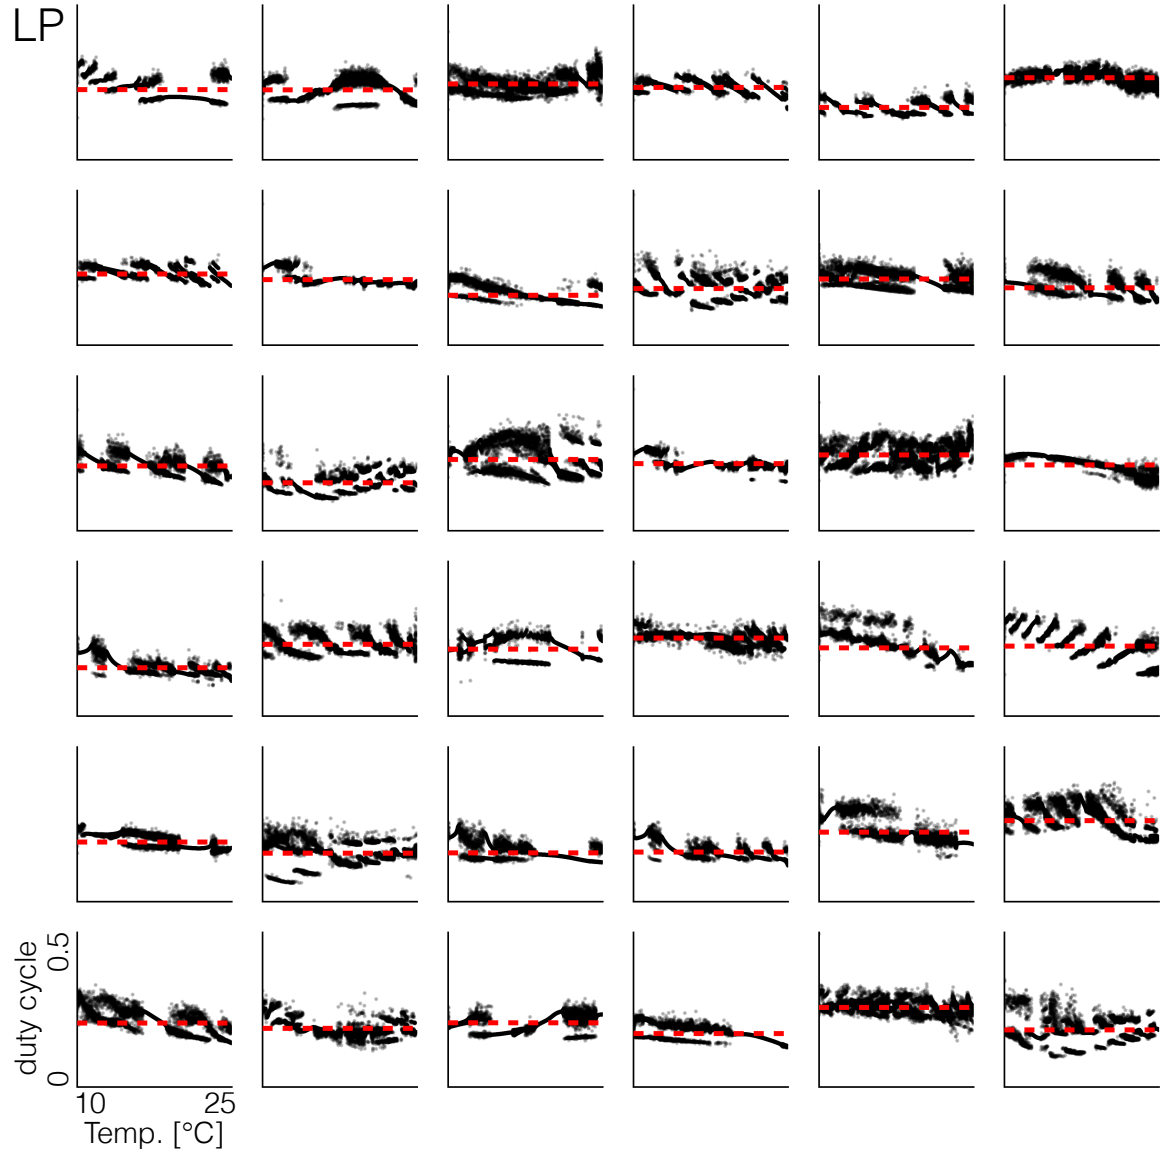

Supplement: supp [file elife-55470-supp-v1.zip]

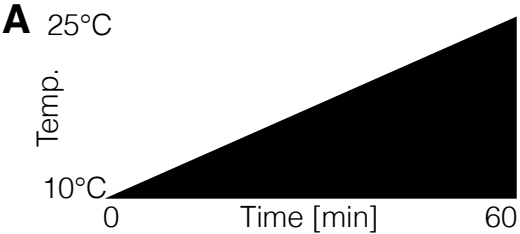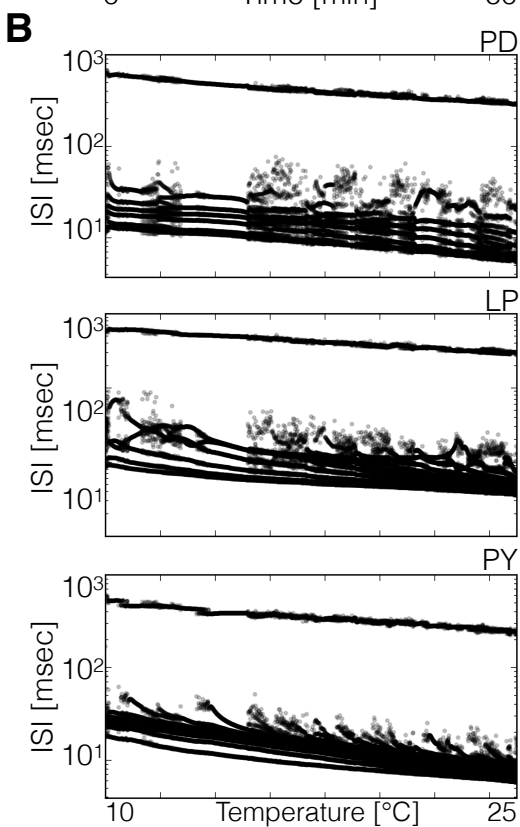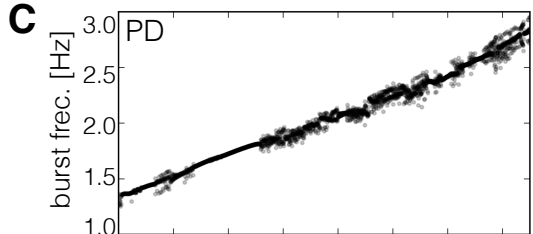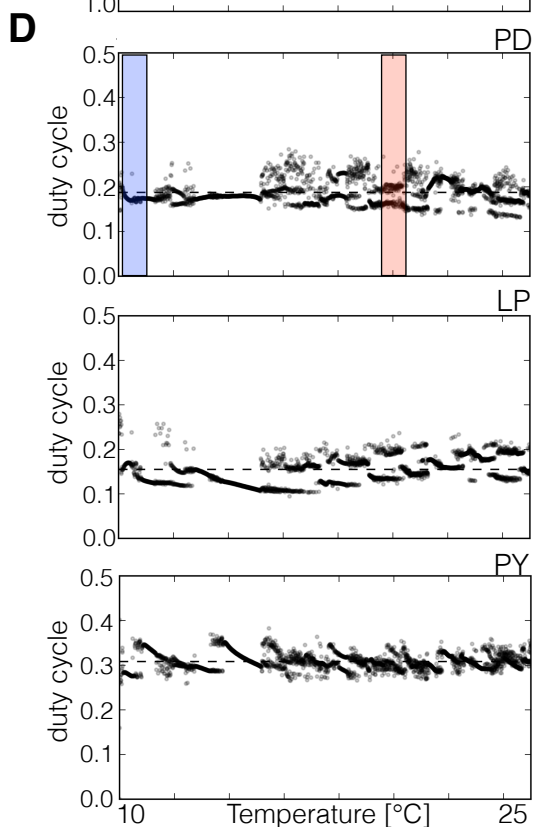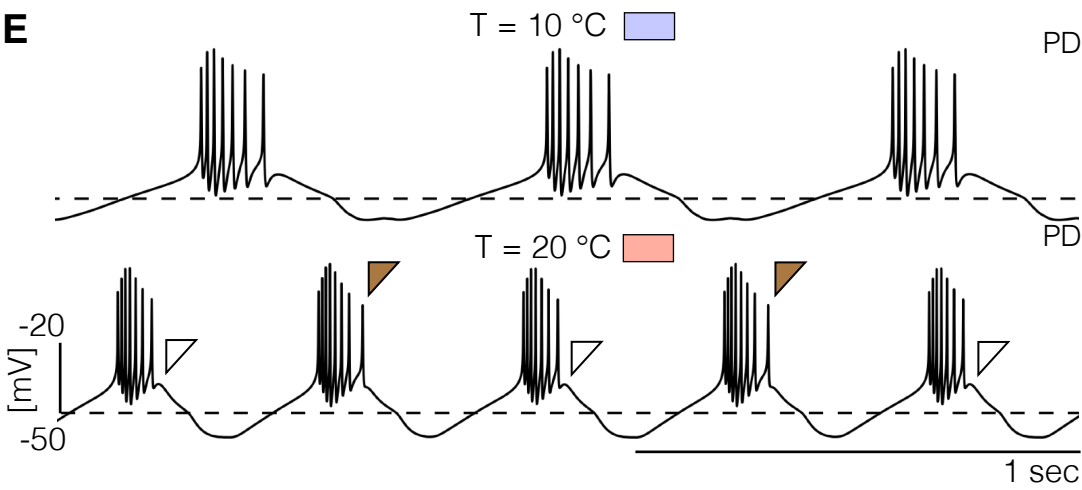

Supplement: supp [file elife-55470-supp-v1.zip]

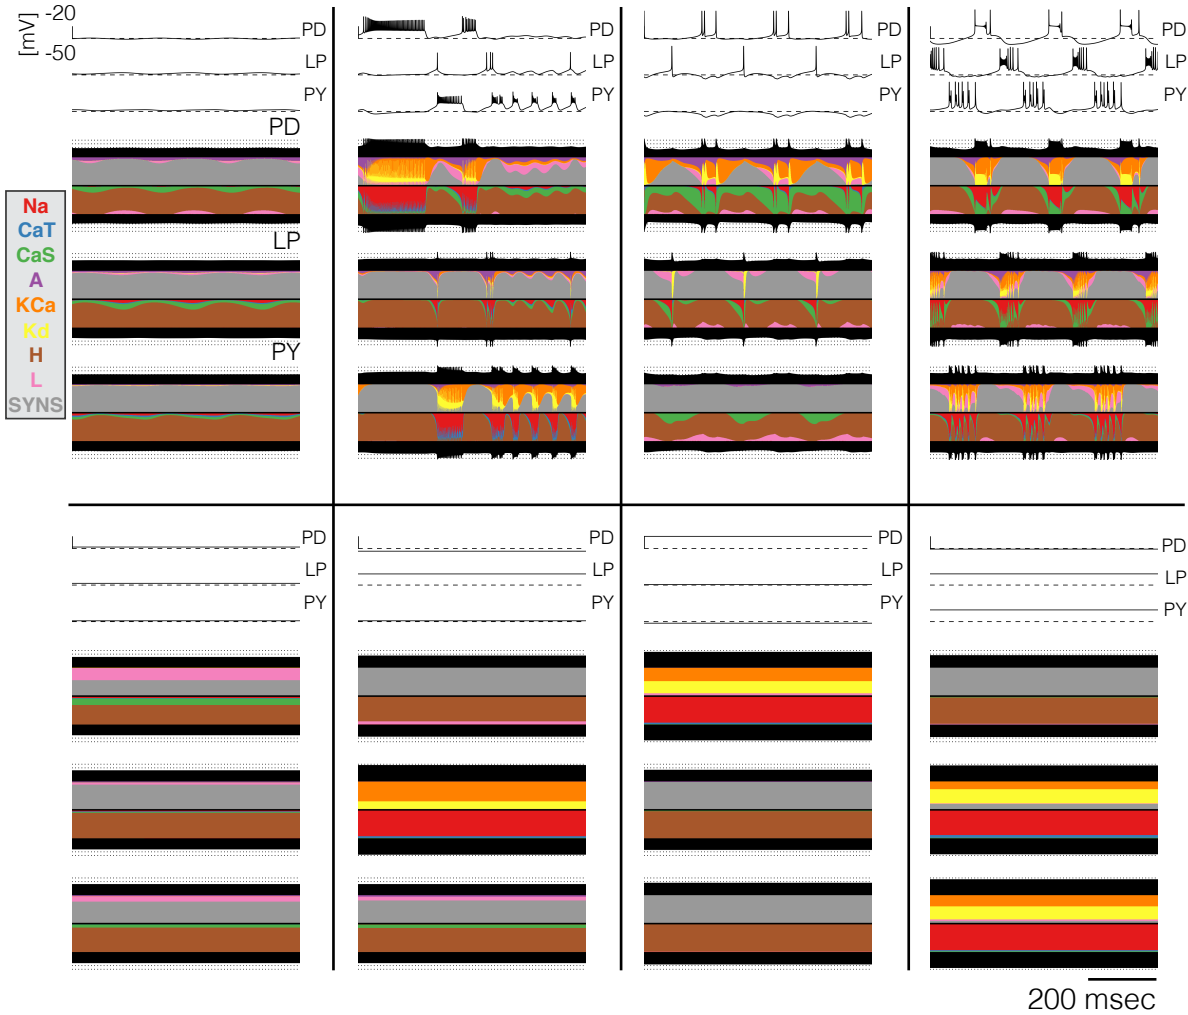

Supplement: supp [file elife-55470-supp-v1.zip › elife_poa_e55470_Figure_6_figure_supplement_1.pdf]
